# Supplementary material
Source: publisher figshare collection journal article supplement (https://acs.figshare.com/ndownloader/files/26011138)

## **Supplementary Information**

### **Role of multi-omics to understand host-pathogen interaction in COVID-19 pathogenesis**

Shalini Aggarwal<sup>1\$</sup>, Arup Acharjee<sup>1\$</sup>, Amrita Mukherjee<sup>1</sup>, Mark Baker<sup>2</sup>, Sanjeeva Srivastava<sup>1\*</sup>

<sup>1</sup>Department of Biosciences and Bioengineering, Indian Institute of Technology Bombay, Mumbai 400076, India

<sup>2</sup>Department of Medicine and Health Sciences, Macquarie University, Sydney, Australia

<sup>\$</sup>These authors contributed equally to this work

<sup>\*</sup>Correspondence: Dr. Sanjeeva Srivastava, E-mail: [sanjeeva@iitb.ac.in](mailto:sanjeeva@iitb.ac.in)

Phone: +91-22-2576-7779, Fax: +91-22-2572-3480

### **Supplementary Tables**

Table S1: List of altered proteins in COVID-19 positive patients from published research articles and information for metadata analysis

Table S2: List of altered metabolites in COVID-19 positive patients from published research articles and information for metadata analysis

### **Supplementary Figures**

Figure S1: Gene ontology analysis of the altered proteins in COVID-19 positive patients

Figure S2: Altered metabolites mapped on altered pathways in SARS-CoV2 host

Figure S3: Inter-mapped significant metabolites and proteins pathways

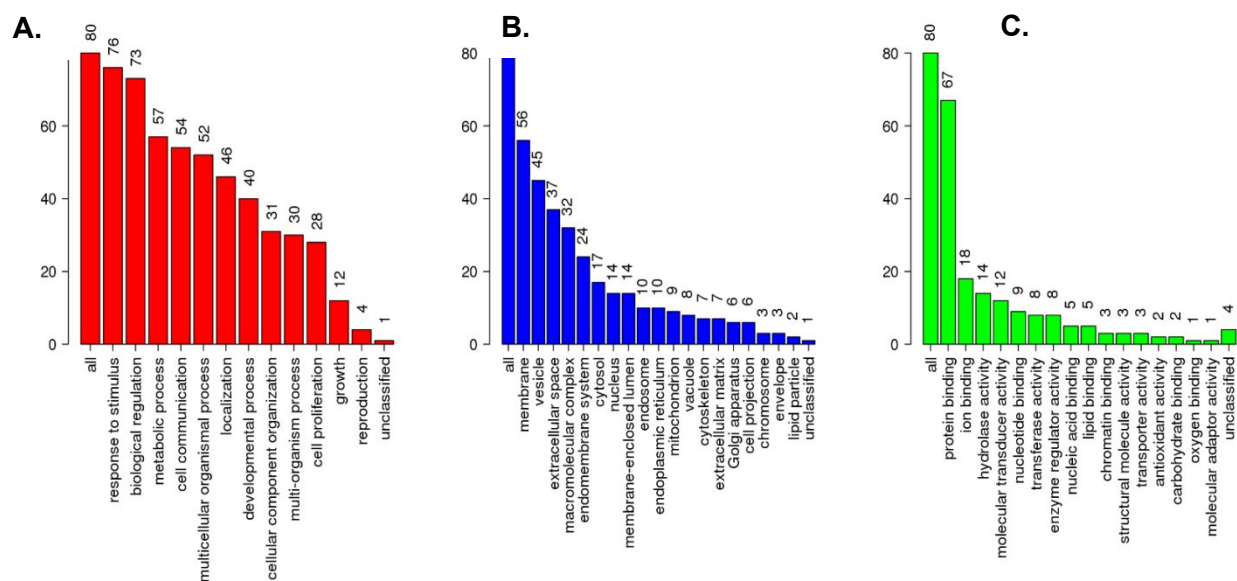

**Figure S1:** Gene ontology analysis of the altered proteins in COVID-19 positive patients, A. represents the bar chart of biological process categories, B. represents the bar chart of Cellular Component categories and C. represents the bar chart of Function categories

#### A. Arginine biosynthesis

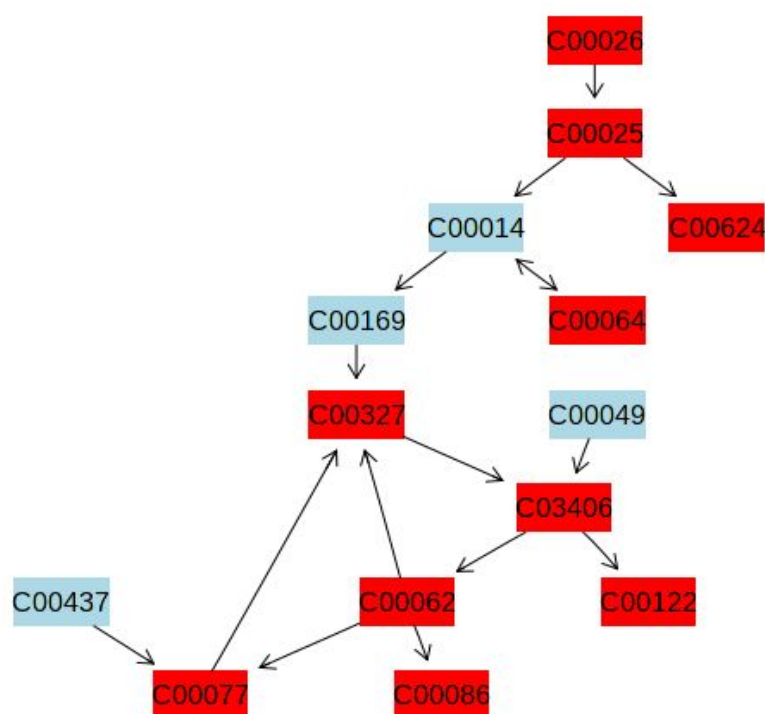

## B. Alanine, aspartate and glutamate metabolism

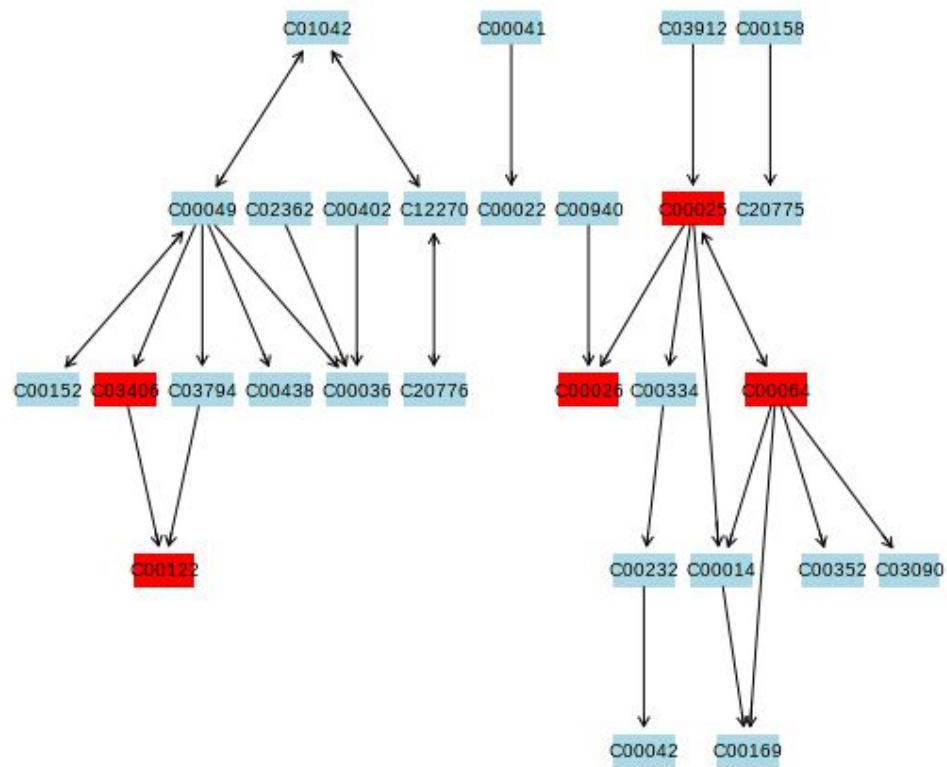

## C. D-Glutamine and D-glutamate metabolism

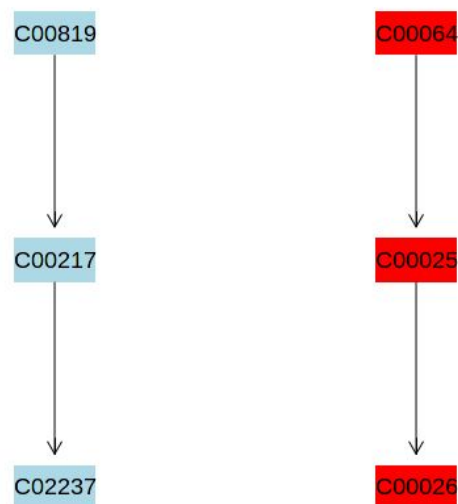

#### D. Starch and sucrose metabolism

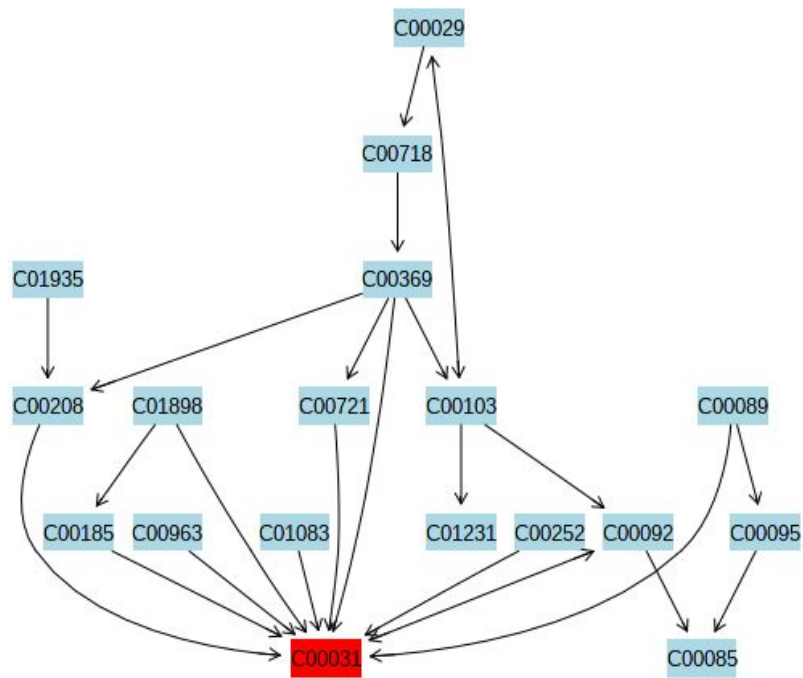

#### E. Nicotinate and nicotinamide metabolism

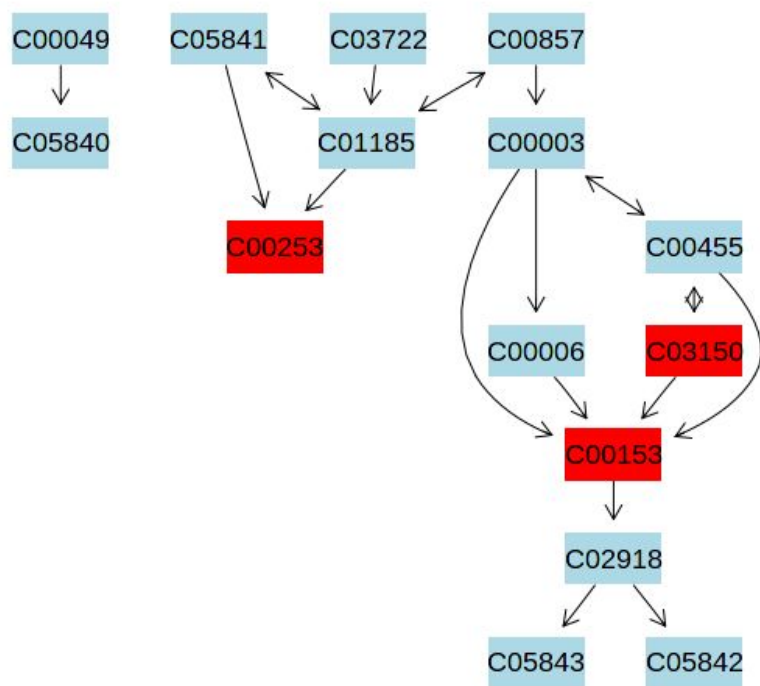

## F. Aminoacyl-tRNA biosynthesis

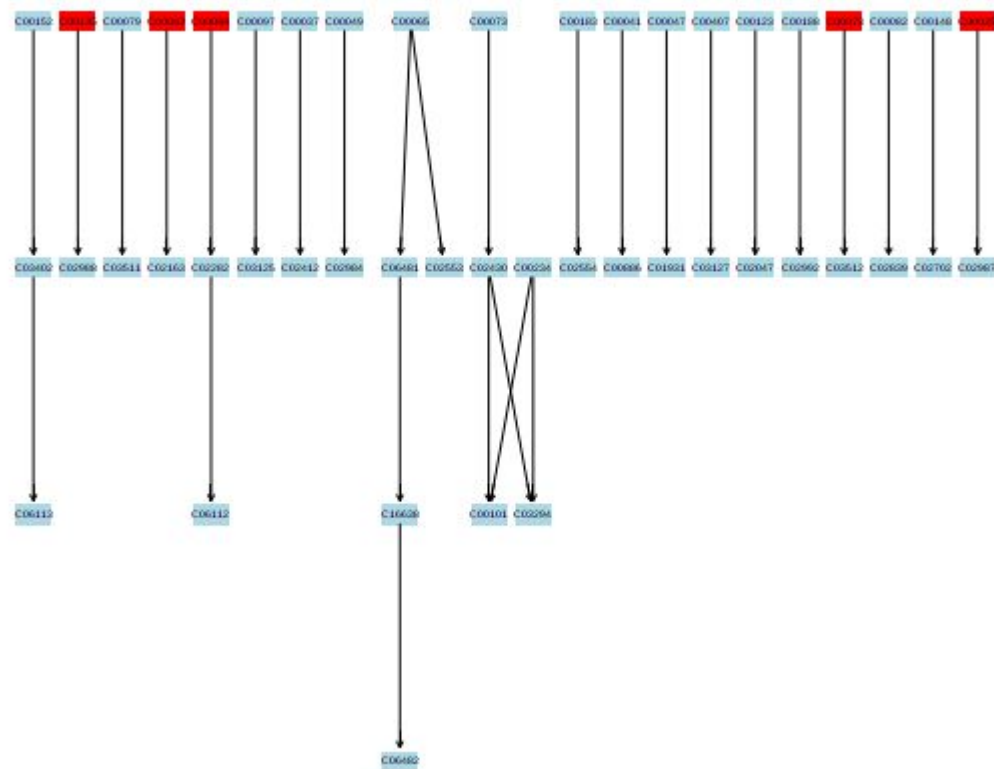

**Figure S2:** Altered metabolites mapped on altered pathways in SARS-CoV2 host, A. Arginine biosynthesis, B. Alanine, aspartate and glutamate metabolism, C. D-Glutamine and D-glutamate metabolism, D. Starch and sucrose metabolism, E. Nicotinate and nicotinamide metabolism and F. Aminoacyl-tRNA biosynthesis

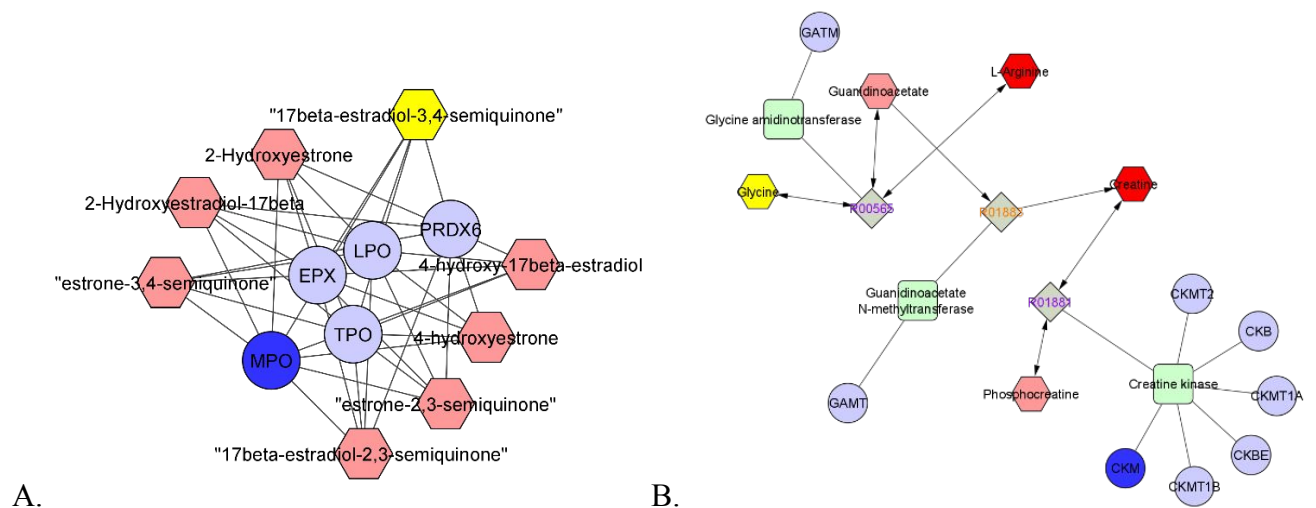

C.

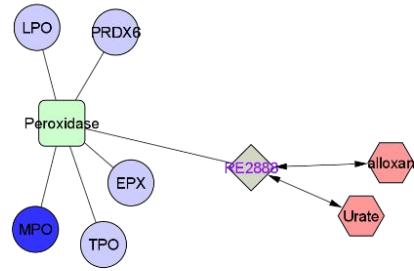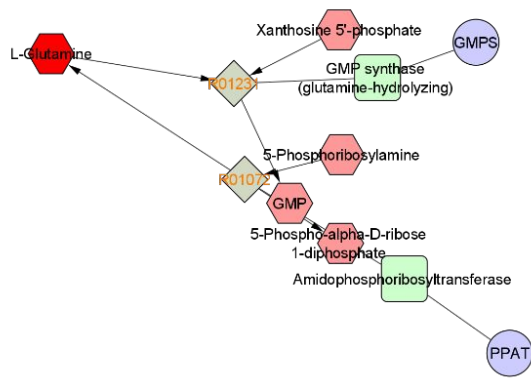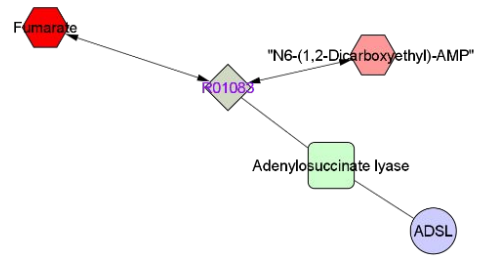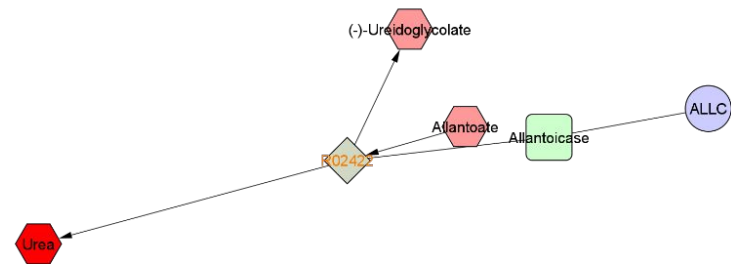

Supplement: Supplementary file 1 [file 26011138]
